# Supplementary material
Source: HighWire-hosted journal article supplement (https://bjsm.bmj.com/content/52/6/387)
Supplement: inline-supplementary-material-2 [file inline-supplementary-material-2.pdf]

# Risk of Bias assessment of included studies

Coloring for the Risk of Bias Forming and creating  
 1 (Low risk of Bias)  
 2 (High Risk of Bias)  
 3 (Unclear Risk of Bias)

| Item               | Mid-portion Achilles tendinopathy                                                                                                  | Insertional Achilles tendinopathy | Mixed non-specified Achilles tendinopathy | GTFS             | MTSS             | Patellar tendinopathy | PHT              |
|--------------------|------------------------------------------------------------------------------------------------------------------------------------|-----------------------------------|-------------------------------------------|------------------|------------------|-----------------------|------------------|
| 1                  | Random Sequence Generation                                                                                                         | Low Risk of Bias                  | Low Risk of Bias                          | Low Risk of Bias | Low Risk of Bias | Low Risk of Bias      | Low Risk of Bias |
| 2                  | Allocation concealment                                                                                                             | Low Risk of Bias                  | Low Risk of Bias                          | Low Risk of Bias | Low Risk of Bias | Low Risk of Bias      | Low Risk of Bias |
| 3                  | Blinding of Participants and Personnel                                                                                             | Low Risk of Bias                  | Low Risk of Bias                          | Low Risk of Bias | Low Risk of Bias | Low Risk of Bias      | Low Risk of Bias |
| 4                  | Blinding of Care Providers to the Intervention                                                                                     | Low Risk of Bias                  | Low Risk of Bias                          | Low Risk of Bias | Low Risk of Bias | Low Risk of Bias      | Low Risk of Bias |
| 5                  | Blinding of Outcome Assessment                                                                                                     | Low Risk of Bias                  | Low Risk of Bias                          | Low Risk of Bias | Low Risk of Bias | Low Risk of Bias      | Low Risk of Bias |
| 6                  | Incomplete Outcome Data - Reported Data Described and Acceptable                                                                   | Low Risk of Bias                  | Low Risk of Bias                          | Low Risk of Bias | Low Risk of Bias | Low Risk of Bias      | Low Risk of Bias |
| 7                  | Incomplete Outcome Data - Reported Data Described and Acceptable - All Randomized Participants Analyzed in the All-treatment Group | Low Risk of Bias                  | Low Risk of Bias                          | Low Risk of Bias | Low Risk of Bias | Low Risk of Bias      | Low Risk of Bias |
| 8                  | Selective Reporting                                                                                                                | Low Risk of Bias                  | Low Risk of Bias                          | Low Risk of Bias | Low Risk of Bias | Low Risk of Bias      | Low Risk of Bias |
| 9                  | Groups Similar at Baseline (Prognostic Indicators)                                                                                 | Low Risk of Bias                  | Low Risk of Bias                          | Low Risk of Bias | Low Risk of Bias | Low Risk of Bias      | Low Risk of Bias |
| 10                 | Co-interventions Assessed or Similar                                                                                               | Low Risk of Bias                  | Low Risk of Bias                          | Low Risk of Bias | Low Risk of Bias | Low Risk of Bias      | Low Risk of Bias |
| 11                 | Compliance Assessed                                                                                                                | Low Risk of Bias                  | Low Risk of Bias                          | Low Risk of Bias | Low Risk of Bias | Low Risk of Bias      | Low Risk of Bias |
| 12                 | Similar Timing of the Outcome Assessment in Groups                                                                                 | Low Risk of Bias                  | Low Risk of Bias                          | Low Risk of Bias | Low Risk of Bias | Low Risk of Bias      | Low Risk of Bias |
| 13                 | Other Bias                                                                                                                         | Low Risk of Bias                  | Low Risk of Bias                          | Low Risk of Bias | Low Risk of Bias | Low Risk of Bias      | Low Risk of Bias |
| Notes for Item 1   |                                                                                                                                    |                                   |                                           |                  |                  |                       |                  |
| Notes for Item 2   |                                                                                                                                    |                                   |                                           |                  |                  |                       |                  |
| Notes for Item 3   |                                                                                                                                    |                                   |                                           |                  |                  |                       |                  |
| Notes for Item 4   |                                                                                                                                    |                                   |                                           |                  |                  |                       |                  |
| Notes for Item 5   |                                                                                                                                    |                                   |                                           |                  |                  |                       |                  |
| Notes for Item 6   |                                                                                                                                    |                                   |                                           |                  |                  |                       |                  |
| Notes for Item 7   |                                                                                                                                    |                                   |                                           |                  |                  |                       |                  |
| Notes for Item 8   |                                                                                                                                    |                                   |                                           |                  |                  |                       |                  |
| Notes for Item 9   |                                                                                                                                    |                                   |                                           |                  |                  |                       |                  |
| Notes for Item 10  |                                                                                                                                    |                                   |                                           |                  |                  |                       |                  |
| Notes for Item 11  |                                                                                                                                    |                                   |                                           |                  |                  |                       |                  |
| Notes for Item 12  |                                                                                                                                    |                                   |                                           |                  |                  |                       |                  |
| Notes for Item 13  |                                                                                                                                    |                                   |                                           |                  |                  |                       |                  |
| Notes for Item 14  |                                                                                                                                    |                                   |                                           |                  |                  |                       |                  |
| Notes for Item 15  |                                                                                                                                    |                                   |                                           |                  |                  |                       |                  |
| Notes for Item 16  |                                                                                                                                    |                                   |                                           |                  |                  |                       |                  |
| Notes for Item 17  |                                                                                                                                    |                                   |                                           |                  |                  |                       |                  |
| Notes for Item 18  |                                                                                                                                    |                                   |                                           |                  |                  |                       |                  |
| Notes for Item 19  |                                                                                                                                    |                                   |                                           |                  |                  |                       |                  |
| Notes for Item 20  |                                                                                                                                    |                                   |                                           |                  |                  |                       |                  |
| Notes for Item 21  |                                                                                                                                    |                                   |                                           |                  |                  |                       |                  |
| Notes for Item 22  |                                                                                                                                    |                                   |                                           |                  |                  |                       |                  |
| Notes for Item 23  |                                                                                                                                    |                                   |                                           |                  |                  |                       |                  |
| Notes for Item 24  |                                                                                                                                    |                                   |                                           |                  |                  |                       |                  |
| Notes for Item 25  |                                                                                                                                    |                                   |                                           |                  |                  |                       |                  |
| Notes for Item 26  |                                                                                                                                    |                                   |                                           |                  |                  |                       |                  |
| Notes for Item 27  |                                                                                                                                    |                                   |                                           |                  |                  |                       |                  |
| Notes for Item 28  |                                                                                                                                    |                                   |                                           |                  |                  |                       |                  |
| Notes for Item 29  |                                                                                                                                    |                                   |                                           |                  |                  |                       |                  |
| Notes for Item 30  |                                                                                                                                    |                                   |                                           |                  |                  |                       |                  |
| Notes for Item 31  |                                                                                                                                    |                                   |                                           |                  |                  |                       |                  |
| Notes for Item 32  |                                                                                                                                    |                                   |                                           |                  |                  |                       |                  |
| Notes for Item 33  |                                                                                                                                    |                                   |                                           |                  |                  |                       |                  |
| Notes for Item 34  |                                                                                                                                    |                                   |                                           |                  |                  |                       |                  |
| Notes for Item 35  |                                                                                                                                    |                                   |                                           |                  |                  |                       |                  |
| Notes for Item 36  |                                                                                                                                    |                                   |                                           |                  |                  |                       |                  |
| Notes for Item 37  |                                                                                                                                    |                                   |                                           |                  |                  |                       |                  |
| Notes for Item 38  |                                                                                                                                    |                                   |                                           |                  |                  |                       |                  |
| Notes for Item 39  |                                                                                                                                    |                                   |                                           |                  |                  |                       |                  |
| Notes for Item 40  |                                                                                                                                    |                                   |                                           |                  |                  |                       |                  |
| Notes for Item 41  |                                                                                                                                    |                                   |                                           |                  |                  |                       |                  |
| Notes for Item 42  |                                                                                                                                    |                                   |                                           |                  |                  |                       |                  |
| Notes for Item 43  |                                                                                                                                    |                                   |                                           |                  |                  |                       |                  |
| Notes for Item 44  |                                                                                                                                    |                                   |                                           |                  |                  |                       |                  |
| Notes for Item 45  |                                                                                                                                    |                                   |                                           |                  |                  |                       |                  |
| Notes for Item 46  |                                                                                                                                    |                                   |                                           |                  |                  |                       |                  |
| Notes for Item 47  |                                                                                                                                    |                                   |                                           |                  |                  |                       |                  |
| Notes for Item 48  |                                                                                                                                    |                                   |                                           |                  |                  |                       |                  |
| Notes for Item 49  |                                                                                                                                    |                                   |                                           |                  |                  |                       |                  |
| Notes for Item 50  |                                                                                                                                    |                                   |                                           |                  |                  |                       |                  |
| Notes for Item 51  |                                                                                                                                    |                                   |                                           |                  |                  |                       |                  |
| Notes for Item 52  |                                                                                                                                    |                                   |                                           |                  |                  |                       |                  |
| Notes for Item 53  |                                                                                                                                    |                                   |                                           |                  |                  |                       |                  |
| Notes for Item 54  |                                                                                                                                    |                                   |                                           |                  |                  |                       |                  |
| Notes for Item 55  |                                                                                                                                    |                                   |                                           |                  |                  |                       |                  |
| Notes for Item 56  |                                                                                                                                    |                                   |                                           |                  |                  |                       |                  |
| Notes for Item 57  |                                                                                                                                    |                                   |                                           |                  |                  |                       |                  |
| Notes for Item 58  |                                                                                                                                    |                                   |                                           |                  |                  |                       |                  |
| Notes for Item 59  |                                                                                                                                    |                                   |                                           |                  |                  |                       |                  |
| Notes for Item 60  |                                                                                                                                    |                                   |                                           |                  |                  |                       |                  |
| Notes for Item 61  |                                                                                                                                    |                                   |                                           |                  |                  |                       |                  |
| Notes for Item 62  |                                                                                                                                    |                                   |                                           |                  |                  |                       |                  |
| Notes for Item 63  |                                                                                                                                    |                                   |                                           |                  |                  |                       |                  |
| Notes for Item 64  |                                                                                                                                    |                                   |                                           |                  |                  |                       |                  |
| Notes for Item 65  |                                                                                                                                    |                                   |                                           |                  |                  |                       |                  |
| Notes for Item 66  |                                                                                                                                    |                                   |                                           |                  |                  |                       |                  |
| Notes for Item 67  |                                                                                                                                    |                                   |                                           |                  |                  |                       |                  |
| Notes for Item 68  |                                                                                                                                    |                                   |                                           |                  |                  |                       |                  |
| Notes for Item 69  |                                                                                                                                    |                                   |                                           |                  |                  |                       |                  |
| Notes for Item 70  |                                                                                                                                    |                                   |                                           |                  |                  |                       |                  |
| Notes for Item 71  |                                                                                                                                    |                                   |                                           |                  |                  |                       |                  |
| Notes for Item 72  |                                                                                                                                    |                                   |                                           |                  |                  |                       |                  |
| Notes for Item 73  |                                                                                                                                    |                                   |                                           |                  |                  |                       |                  |
| Notes for Item 74  |                                                                                                                                    |                                   |                                           |                  |                  |                       |                  |
| Notes for Item 75  |                                                                                                                                    |                                   |                                           |                  |                  |                       |                  |
| Notes for Item 76  |                                                                                                                                    |                                   |                                           |                  |                  |                       |                  |
| Notes for Item 77  |                                                                                                                                    |                                   |                                           |                  |                  |                       |                  |
| Notes for Item 78  |                                                                                                                                    |                                   |                                           |                  |                  |                       |                  |
| Notes for Item 79  |                                                                                                                                    |                                   |                                           |                  |                  |                       |                  |
| Notes for Item 80  |                                                                                                                                    |                                   |                                           |                  |                  |                       |                  |
| Notes for Item 81  |                                                                                                                                    |                                   |                                           |                  |                  |                       |                  |
| Notes for Item 82  |                                                                                                                                    |                                   |                                           |                  |                  |                       |                  |
| Notes for Item 83  |                                                                                                                                    |                                   |                                           |                  |                  |                       |                  |
| Notes for Item 84  |                                                                                                                                    |                                   |                                           |                  |                  |                       |                  |
| Notes for Item 85  |                                                                                                                                    |                                   |                                           |                  |                  |                       |                  |
| Notes for Item 86  |                                                                                                                                    |                                   |                                           |                  |                  |                       |                  |
| Notes for Item 87  |                                                                                                                                    |                                   |                                           |                  |                  |                       |                  |
| Notes for Item 88  |                                                                                                                                    |                                   |                                           |                  |                  |                       |                  |
| Notes for Item 89  |                                                                                                                                    |                                   |                                           |                  |                  |                       |                  |
| Notes for Item 90  |                                                                                                                                    |                                   |                                           |                  |                  |                       |                  |
| Notes for Item 91  |                                                                                                                                    |                                   |                                           |                  |                  |                       |                  |
| Notes for Item 92  |                                                                                                                                    |                                   |                                           |                  |                  |                       |                  |
| Notes for Item 93  |                                                                                                                                    |                                   |                                           |                  |                  |                       |                  |
| Notes for Item 94  |                                                                                                                                    |                                   |                                           |                  |                  |                       |                  |
| Notes for Item 95  |                                                                                                                                    |                                   |                                           |                  |                  |                       |                  |
| Notes for Item 96  |                                                                                                                                    |                                   |                                           |                  |                  |                       |                  |
| Notes for Item 97  |                                                                                                                                    |                                   |                                           |                  |                  |                       |                  |
| Notes for Item 98  |                                                                                                                                    |                                   |                                           |                  |                  |                       |                  |
| Notes for Item 99  |                                                                                                                                    |                                   |                                           |                  |                  |                       |                  |
| Notes for Item 100 |                                                                                                                                    |                                   |                                           |                  |                  |                       |                  |
| Notes for Item 101 |                                                                                                                                    |                                   |                                           |                  |                  |                       |                  |
| Notes for Item 102 |                                                                                                                                    |                                   |                                           |                  |                  |                       |                  |
| Notes for Item 103 |                                                                                                                                    |                                   |                                           |                  |                  |                       |                  |
| Notes for Item 104 |                                                                                                                                    |                                   |                                           |                  |                  |                       |                  |
| Notes for Item 105 |                                                                                                                                    |                                   |                                           |                  |                  |                       |                  |
| Notes for Item 106 |                                                                                                                                    |                                   |                                           |                  |                  |                       |                  |
| Notes for Item 107 |                                                                                                                                    |                                   |                                           |                  |                  |                       |                  |
| Notes for Item 108 |                                                                                                                                    |                                   |                                           |                  |                  |                       |                  |
| Notes for Item 109 |                                                                                                                                    |                                   |                                           |                  |                  |                       |                  |
| Notes for Item 110 |                                                                                                                                    |                                   |                                           |                  |                  |                       |                  |
| Notes for Item 111 |                                                                                                                                    |                                   |                                           |                  |                  |                       |                  |
| Notes for Item 112 |                                                                                                                                    |                                   |                                           |                  |                  |                       |                  |
| Notes for Item 113 |                                                                                                                                    |                                   |                                           |                  |                  |                       |                  |
| Notes for Item 114 |                                                                                                                                    |                                   |                                           |                  |                  |                       |                  |
| Notes for Item 115 |                                                                                                                                    |                                   |                                           |                  |                  |                       |                  |
| Notes for Item 116 |                                                                                                                                    |                                   |                                           |                  |                  |                       |                  |
| Notes for Item 117 |                                                                                                                                    |                                   |                                           |                  |                  |                       |                  |
| Notes for Item 118 |                                                                                                                                    |                                   |                                           |                  |                  |                       |                  |
| Notes for Item 119 |                                                                                                                                    |                                   |                                           |                  |                  |                       |                  |
| Notes for Item 120 |                                                                                                                                    |                                   |                                           |                  |                  |                       |                  |
| Notes for Item 121 |                                                                                                                                    |                                   |                                           |                  |                  |                       |                  |
| Notes for Item 122 |                                                                                                                                    |                                   |                                           |                  |                  |                       |                  |
| Notes for Item 123 |                                                                                                                                    |                                   |                                           |                  |                  |                       |                  |
| Notes for Item 124 |                                                                                                                                    |                                   |                                           |                  |                  |                       |                  |
| Notes for Item 125 |                                                                                                                                    |                                   |                                           |                  |                  |                       |                  |
| Notes for Item 126 |                                                                                                                                    |                                   |                                           |                  |                  |                       |                  |
| Notes for Item 127 |                                                                                                                                    |                                   |                                           |                  |                  |                       |                  |
| Notes for Item 128 |                                                                                                                                    |                                   |                                           |                  |                  |                       |                  |
| Notes for Item 129 |                                                                                                                                    |                                   |                                           |                  |                  |                       |                  |
| Notes for Item 130 |                                                                                                                                    |                                   |                                           |                  |                  |                       |                  |
| Notes for Item 131 |                                                                                                                                    |                                   |                                           |                  |                  |                       |                  |
| Notes for Item 132 |                                                                                                                                    |                                   |                                           |                  |                  |                       |                  |
| Notes for Item 133 |                                                                                                                                    |                                   |                                           |                  |                  |                       |                  |
| Notes for Item 134 |                                                                                                                                    |                                   |                                           |                  |                  |                       |                  |
| Notes for Item 135 |                                                                                                                                    |                                   |                                           |                  |                  |                       |                  |
| Notes for Item 136 |                                                                                                                                    |                                   |                                           |                  |                  |                       |                  |
| Notes for Item 137 |                                                                                                                                    |                                   |                                           |                  |                  |                       |                  |
| Notes for Item 138 |                                                                                                                                    |                                   |                                           |                  |                  |                       |                  |
| Notes for Item 139 |                                                                                                                                    |                                   |                                           |                  |                  |                       |                  |
| Notes for Item 140 |                                                                                                                                    |                                   |                                           |                  |                  |                       |                  |
| Notes for Item 141 |                                                                                                                                    |                                   |                                           |                  |                  |                       |                  |
| Notes for Item 142 |                                                                                                                                    |                                   |                                           |                  |                  |                       |                  |
| Notes for Item 143 |                                                                                                                                    |                                   |                                           |                  |                  |                       |                  |
| Notes for Item 144 |                                                                                                                                    |                                   |                                           |                  |                  |                       |                  |
| Notes for Item 145 |                                                                                                                                    |                                   |                                           |                  |                  |                       |                  |
| Notes for Item 146 |                                                                                                                                    |                                   |                                           |                  |                  |                       |                  |
| Notes for Item 147 |                                                                                                                                    |                                   |                                           |                  |                  |                       |                  |
| Notes for Item 148 |                                                                                                                                    |                                   |                                           |                  |                  |                       |                  |
| Notes for Item 149 |                                                                                                                                    |                                   |                                           |                  |                  |                       |                  |
| Notes for Item 150 |                                                                                                                                    |                                   |                                           |                  |                  |                       |                  |
| Notes for Item 151 |                                                                                                                                    |                                   |                                           |                  |                  |                       |                  |
| Notes for Item 152 |                                                                                                                                    |                                   |                                           |                  |                  |                       |                  |
| Notes for Item 153 |                                                                                                                                    |                                   |                                           |                  |                  |                       |                  |
| Notes for Item 154 |                                                                                                                                    |                                   |                                           |                  |                  |                       |                  |
| Notes for Item 155 |                                                                                                                                    |                                   |                                           |                  |                  |                       |                  |
| Notes for Item 156 |                                                                                                                                    |                                   |                                           |                  |                  |                       |                  |
| Notes for Item 157 |                                                                                                                                    |                                   |                                           |                  |                  |                       |                  |
| Notes for Item 158 |                                                                                                                                    |                                   |                                           |                  |                  |                       |                  |
| Notes for Item 159 |                                                                                                                                    |                                   |                                           |                  |                  |                       |                  |
| Notes for Item 160 |                                                                                                                                    |                                   |                                           |                  |                  |                       |                  |
| Notes for Item 161 |                                                                                                                                    |                                   |                                           |                  |                  |                       |                  |
| Notes for Item 162 |                                                                                                                                    |                                   |                                           |                  |                  |                       |                  |
| Notes for Item 163 |                                                                                                                                    |                                   |                                           |                  |                  |                       |                  |
| Notes for Item 164 |                                                                                                                                    |                                   |                                           |                  |                  |                       |                  |
| Notes for Item 165 |                                                                                                                                    |                                   |                                           |                  |                  |                       |                  |
| Notes for Item 166 |                                                                                                                                    |                                   |                                           |                  |                  |                       |                  |
| Notes for Item 167 |                                                                                                                                    |                                   |                                           |                  |                  |                       |                  |
| Notes for Item 168 |                                                                                                                                    |                                   |                                           |                  |                  |                       |                  |
| Notes for Item 169 |                                                                                                                                    |                                   |                                           |                  |                  |                       |                  |
| Notes for Item 170 |                                                                                                                                    |                                   |                                           |                  |                  |                       |                  |
| Notes for Item 171 |                                                                                                                                    |                                   |                                           |                  |                  |                       |                  |
| Notes for Item 172 |                                                                                                                                    |                                   |                                           |                  |                  |                       |                  |
| Notes for Item 173 |                                                                                                                                    |                                   |                                           |                  |                  |                       |                  |
| Notes for Item 174 |                                                                                                                                    |                                   |                                           |                  |                  |                       |                  |
| Notes for Item 175 |                                                                                                                                    |                                   |                                           |                  |                  |                       |                  |
| Notes for Item 176 |                                                                                                                                    |                                   |                                           |                  |                  |                       |                  |
| Notes for Item 177 |                                                                                                                                    |                                   |                                           |                  |                  |                       |                  |
| Notes for Item 178 |                                                                                                                                    |                                   |                                           |                  |                  |                       |                  |
| Notes for Item 179 |                                                                                                                                    |                                   |                                           |                  |                  |                       |                  |
| Notes for Item 180 |                                                                                                                                    |                                   |                                           |                  |                  |                       |                  |
| Notes for Item 181 |                                                                                                                                    |                                   |                                           |                  |                  |                       |                  |
| Notes for Item 182 |                                                                                                                                    |                                   |                                           |                  |                  |                       |                  |
| Notes for Item 183 |                                                                                                                                    |                                   |                                           |                  |                  |                       |                  |
| Notes for Item 184 |                                                                                                                                    |                                   |                                           |                  |                  |                       |                  |
| Notes for Item 185 |                                                                                                                                    |                                   |                                           |                  |                  |                       |                  |
| Notes for Item 186 |                                                                                                                                    |                                   |                                           |                  |                  |                       |                  |
| Notes for Item 187 |                                                                                                                                    |                                   |                                           |                  |                  |                       |                  |
| Notes for Item 188 |                                                                                                                                    |                                   |                                           |                  |                  |                       |                  |
| Notes for Item 189 |                                                                                                                                    |                                   |                                           |                  |                  |                       |                  |
| Notes for Item 190 |                                                                                                                                    |                                   |                                           |                  |                  |                       |                  |
| Notes for Item 191 |                                                                                                                                    |                                   |                                           |                  |                  |                       |                  |
| Notes for Item 192 |                                                                                                                                    |                                   |                                           |                  |                  |                       |                  |
| Notes for Item 193 |                                                                                                                                    |                                   |                                           |                  |                  |                       |                  |
| Notes for Item 194 |                                                                                                                                    |                                   |                                           |                  |                  |                       |                  |
| Notes for Item 195 |                                                                                                                                    |                                   |                                           |                  |                  |                       |                  |
| Notes for Item 196 |                                                                                                                                    |                                   |                                           |                  |                  |                       |                  |
| Notes for Item 197 |                                                                                                                                    |                                   |                                           |                  |                  |                       |                  |
| Notes for Item 198 |                                                                                                                                    |                                   |                                           |                  |                  |                       |                  |
| Notes for Item 199 |                                                                                                                                    |                                   |                                           |                  |                  |                       |                  |
| Notes for Item 200 |                                                                                                                                    |                                   |                                           |                  |                  |                       |                  |
| Notes for Item 201 |                                                                                                                                    |                                   |                                           |                  |                  |                       |                  |
| Notes for Item 202 |                                                                                                                                    |                                   |                                           |                  | </               |                       |                  |
